# Supplementary material for: Locating and quantifying CH 4 sources within a wastewater treatment plant based on mobile measurements
Source: Copernicus journal article supplement (doi:10.5194/acp-25-4571-2025), 2025-04-25
Supplement: Supplementary file 1 [file acp-25-4571-2025-supplement.pdf]

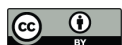

*Supplement of*

## **Locating and quantifying CH<sub>4</sub> sources within a wastewater treatment plant based on mobile measurements**

**Junyue Yang et al.**

*Correspondence to:* Yuzhong Zhang ([zhangyuzhong@westlake.edu.cn](mailto:zhangyuzhong@westlake.edu.cn)) and Zhibin Wang ([wangzhibin@zju.edu.cn](mailto:wangzhibin@zju.edu.cn))

The copyright of individual parts of the supplement might differ from the article licence.

21 **Figures**

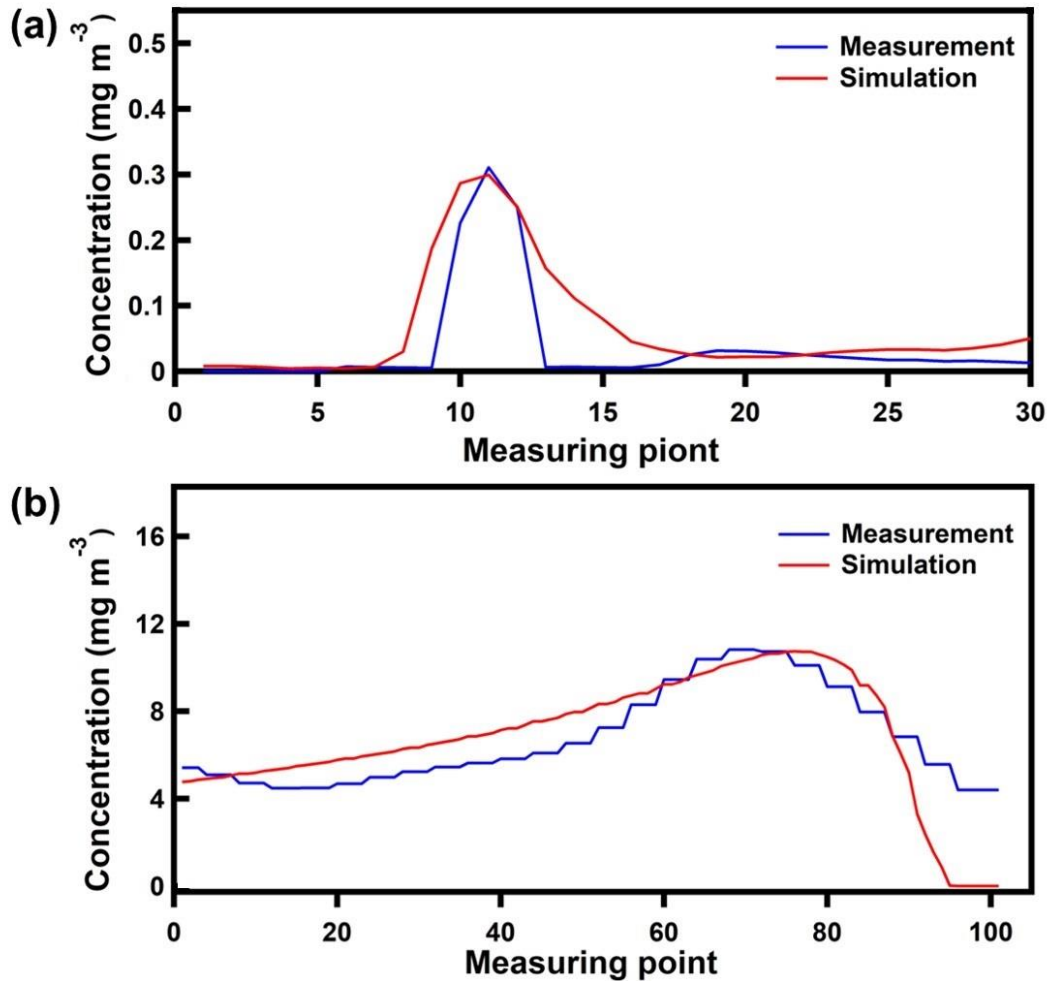

22

23 **Figure S1.** Comparison of CH<sub>4</sub> measurement and model simulation. (a) CH<sub>4</sub> concentration  
24 measurements for Aeration Tank ① and point source model simulation on 29 June (b) CH<sub>4</sub>  
25 concentration measurements and the line source model simulation on a road between the Screen ①  
26 and the Primary Clarifier ①.

27

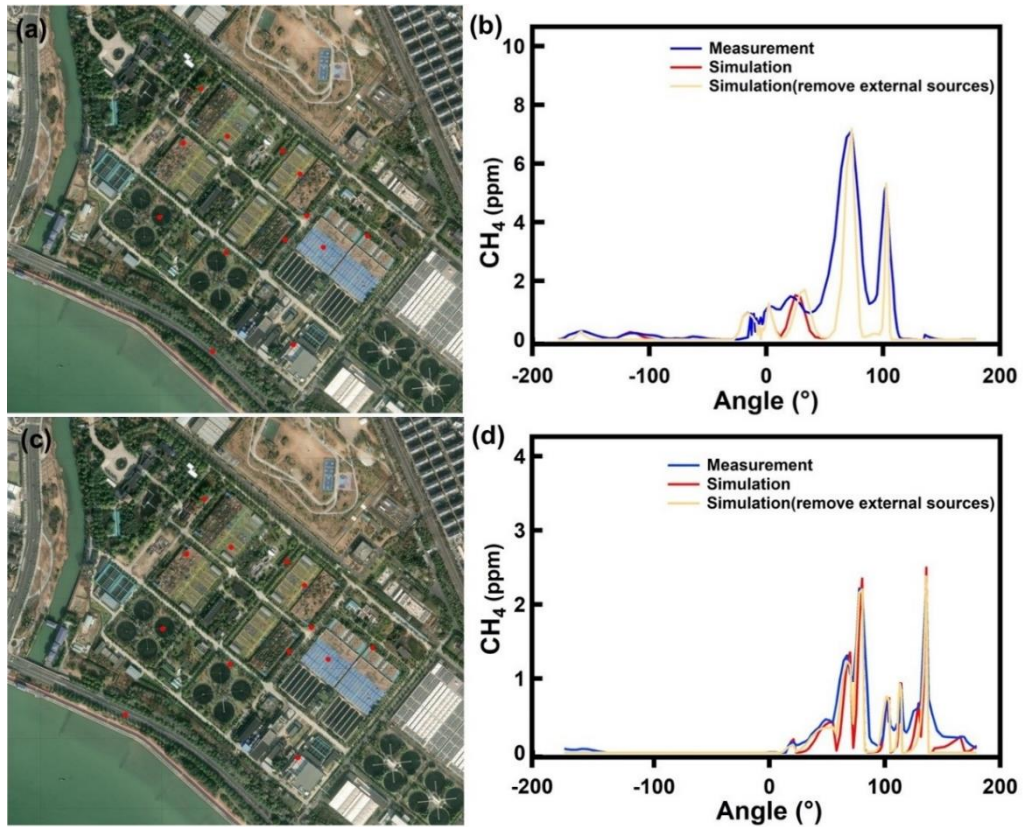

28  
 29 **Figure S2.** The emission sources localization on 29 June (a) and 13 December (c). And the  
 30 comparison of CH<sub>4</sub> measurement and model simulation (considering external sources) on 29 June  
 31 (b) and 13 December (d). Map data are from Esri.  
 32

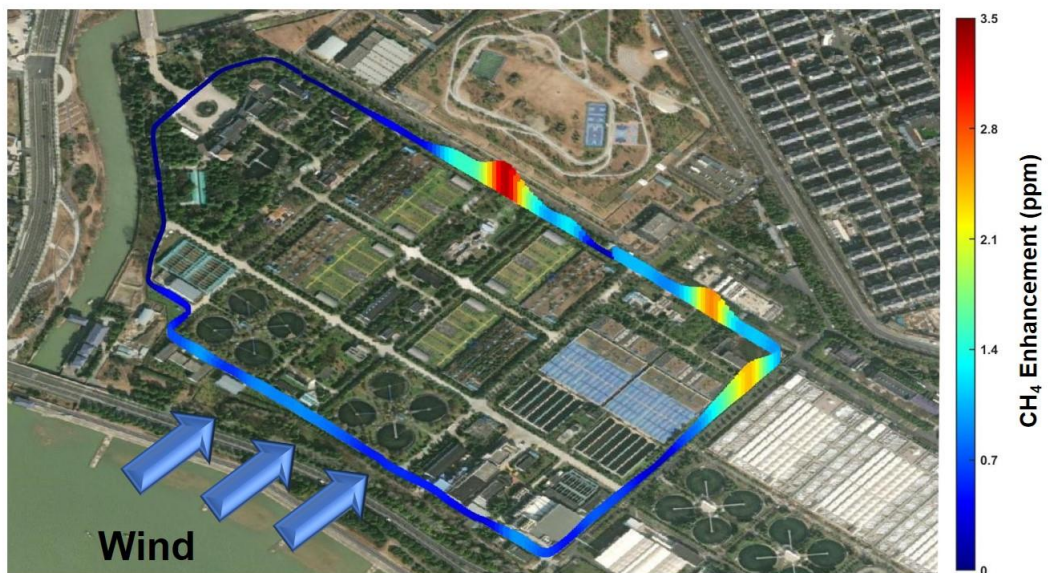

33  
 34 **Figure S3.** The CH<sub>4</sub> concentration map for the external roads of the WWTP on 1 June. Map data are  
 35 from Esri.

36

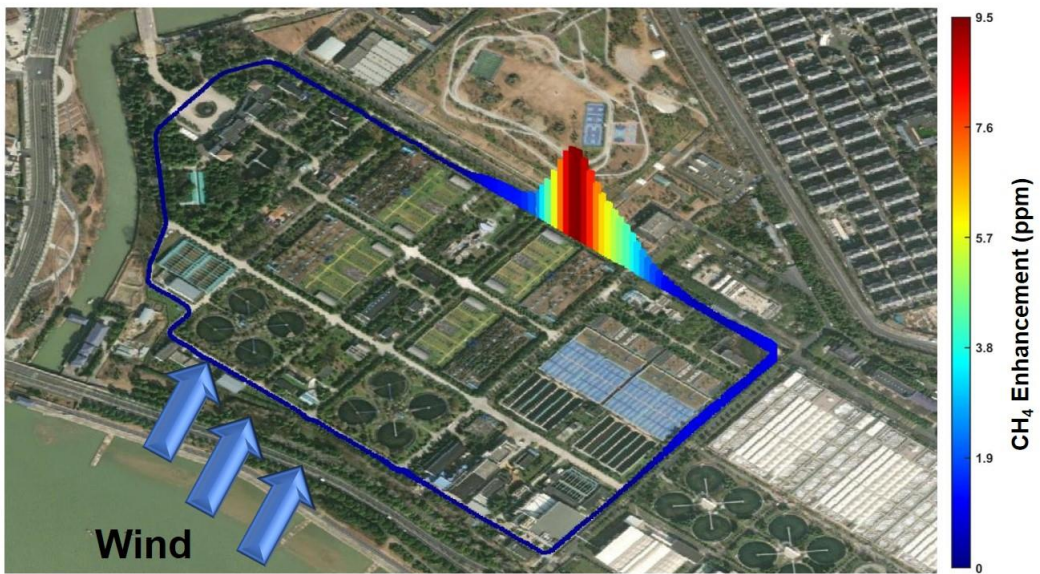

37

38 **Figure S4.** The CH<sub>4</sub> concentration map for the external roads of the WWTP on 11 July. Map data

39 are from Esri.

40

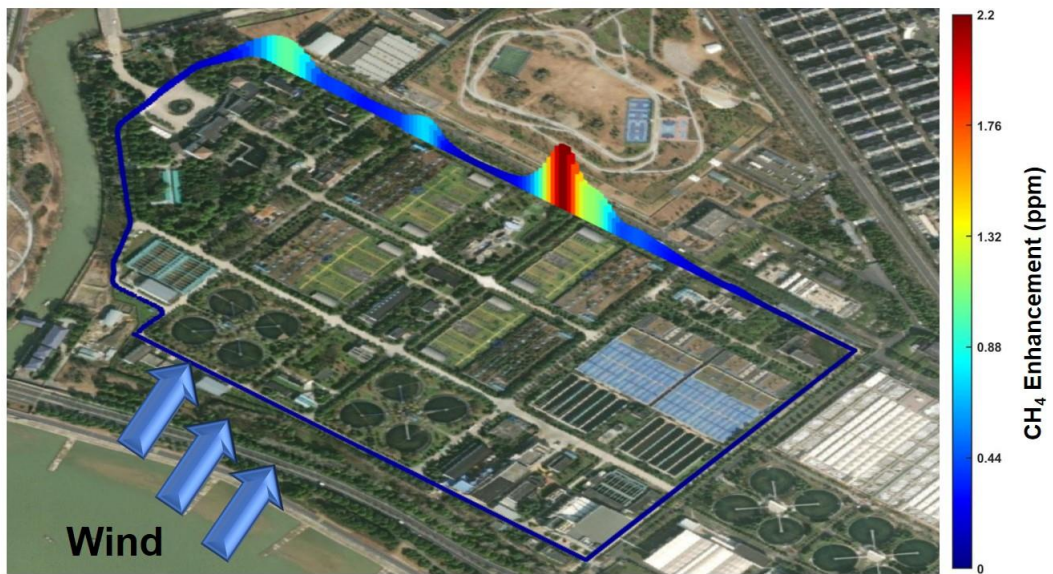

41

42 **Figure S5.** The CH<sub>4</sub> concentration map for the external roads of the WWTP on 14 December. Map

43 data are from Esri.

44

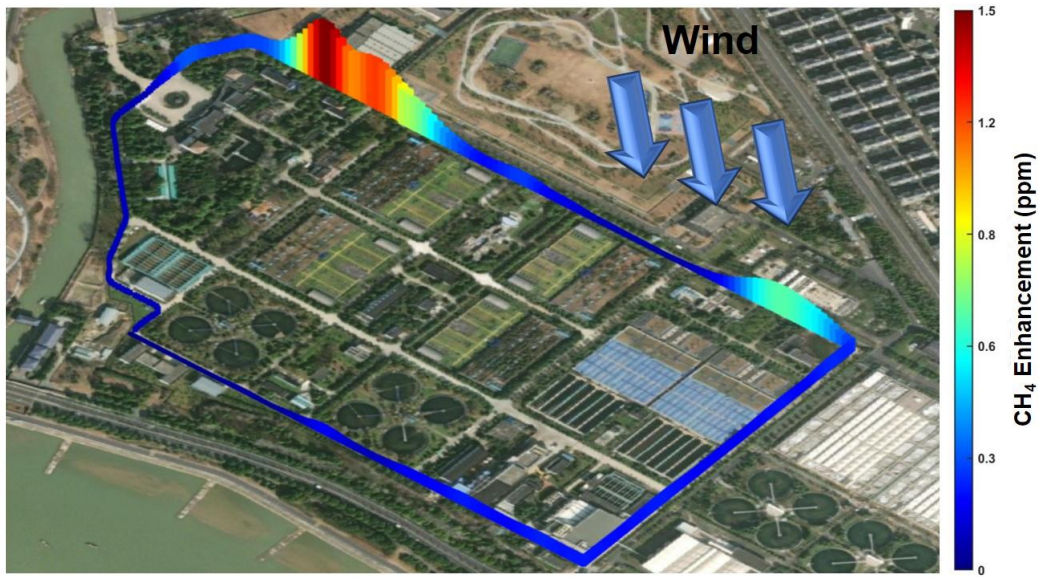

45

46 **Figure S6.** The CH<sub>4</sub> concentration map for the external roads of the WWTP on 20 December. Map  
 47 data are from Esri.

48

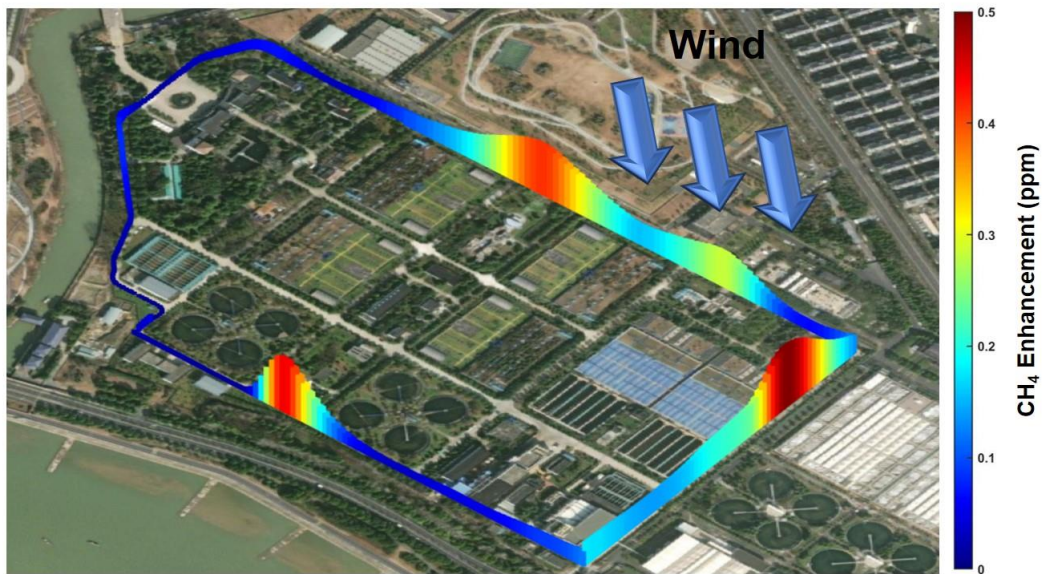

49

50 **Figure S7.** The CH<sub>4</sub> concentration map for the external roads of the WWTP on 21 December. Map  
 51 data are from Esri.

52

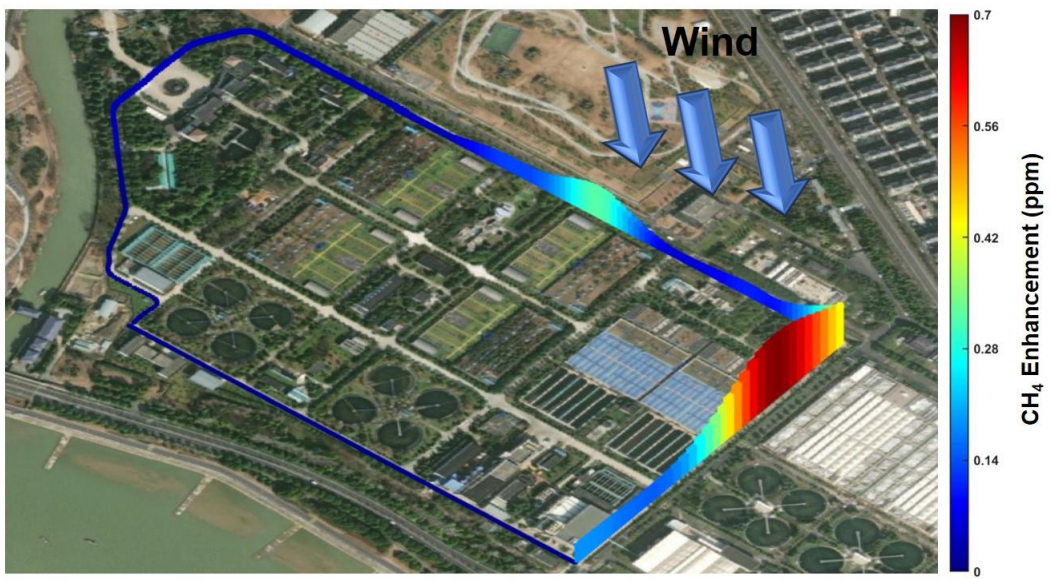

53

54 **Figure S8.** The CH<sub>4</sub> concentration map for the external roads of the WWTP on 22 December. Map  
55 data are from Esri.

56

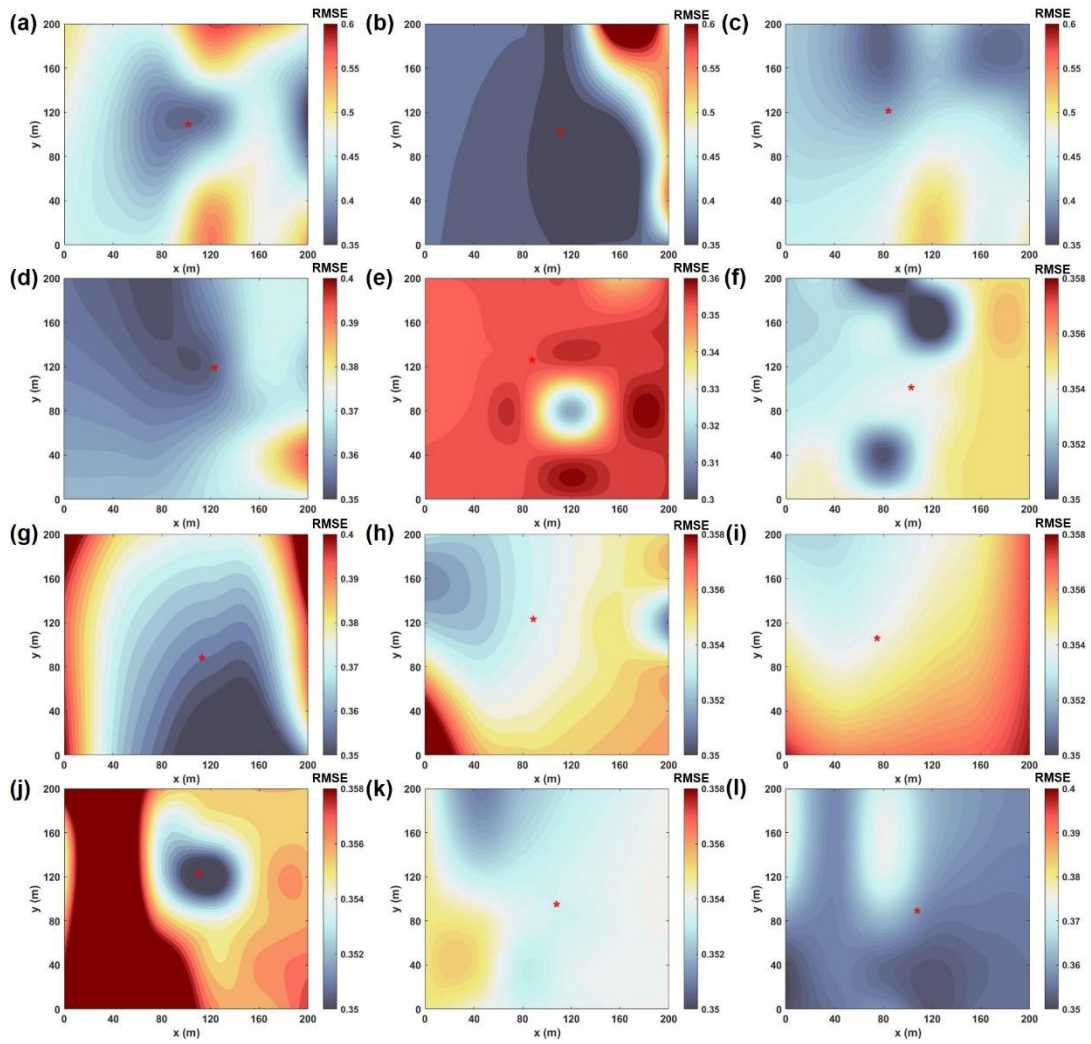

57

58 **Figure S9.** The root-mean-square error (RMSE) of monitoring simulated concentration changes

59 with the location of the WWTP source on 1 June.

60

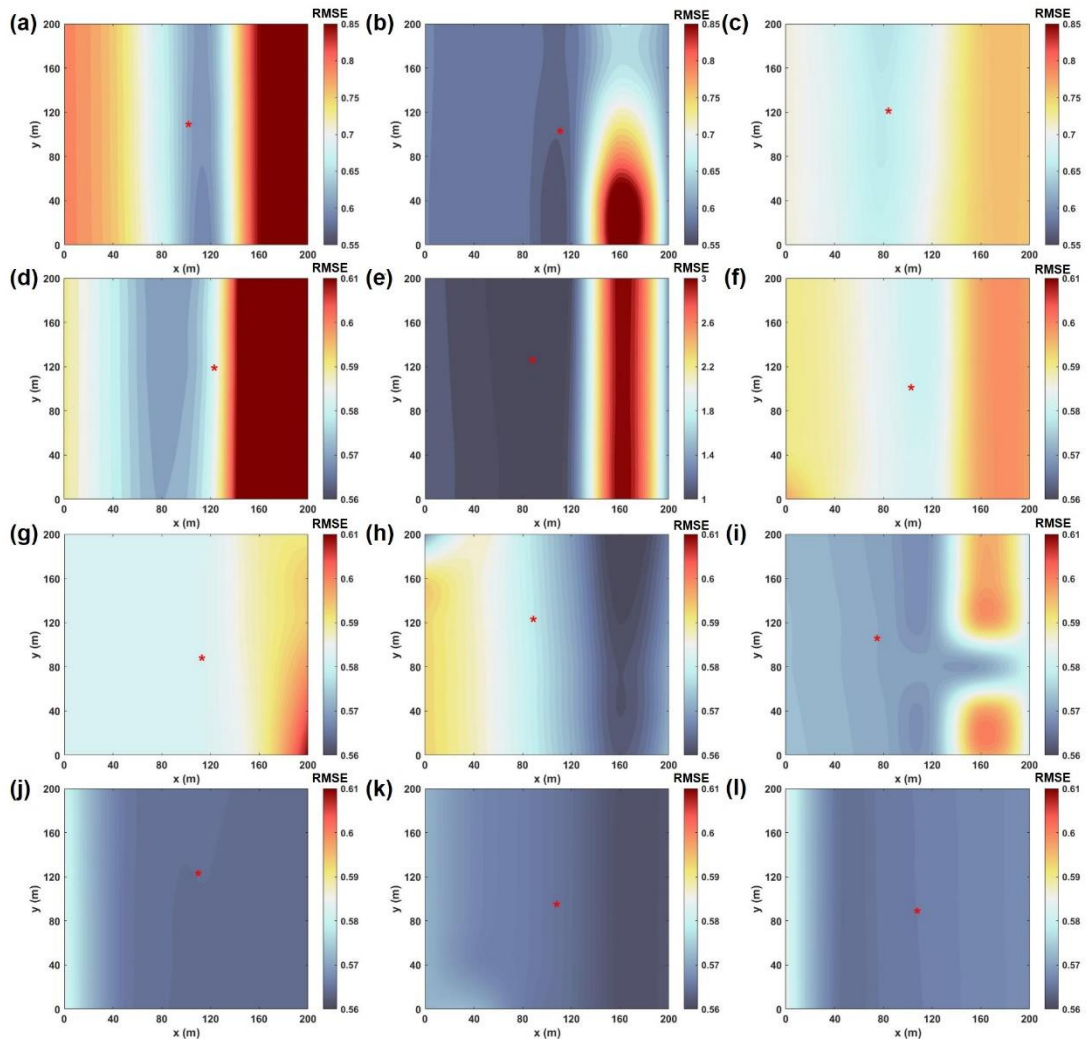

61

62 **Figure S10.** The root-mean-square error (RMSE) of monitoring simulated concentration changes

63 with the location of the WWTP source on 11 July.

64



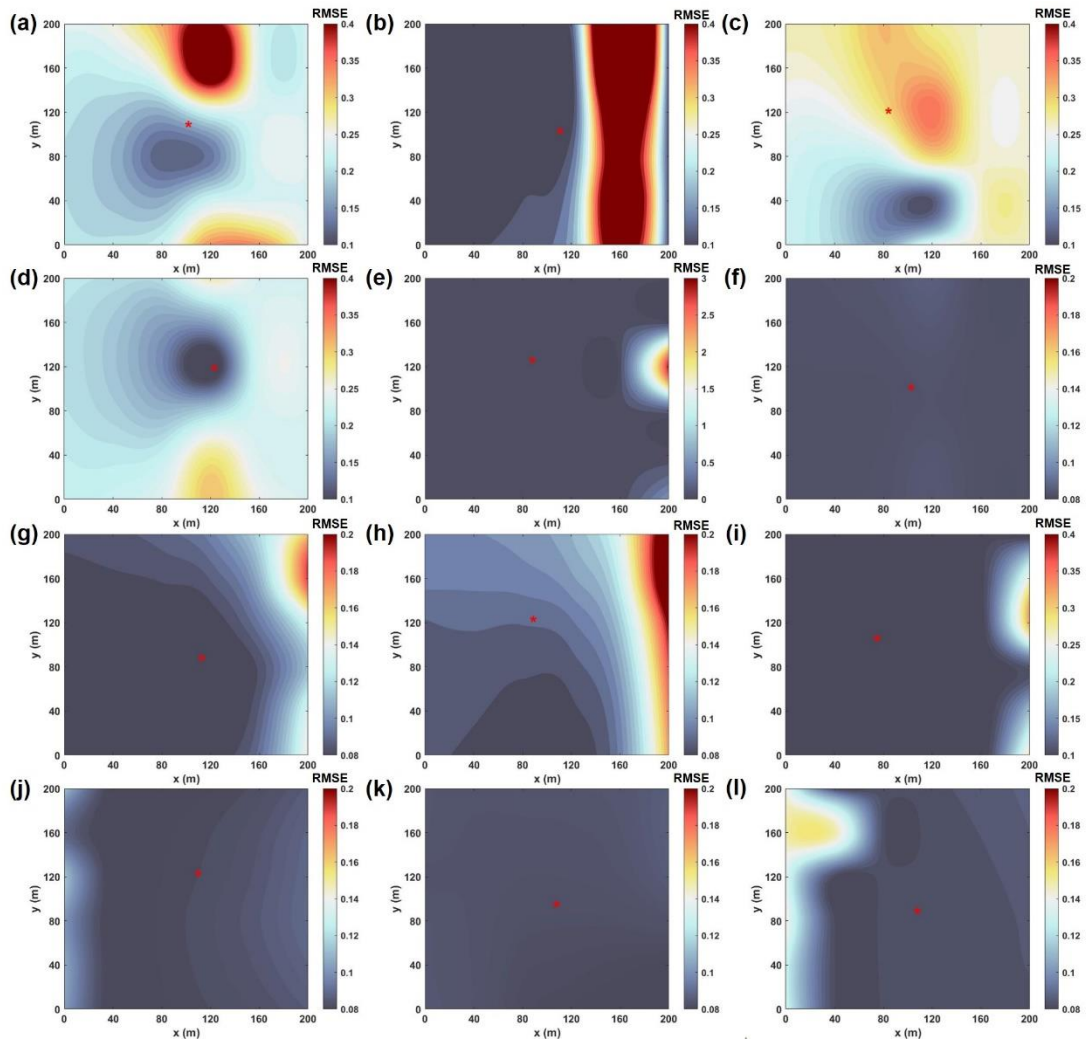

65

66 **Figure S11.** The root-mean-square error (RMSE) of monitoring simulated concentration changes

67 with the location of the WWTP source on 14 December.

68

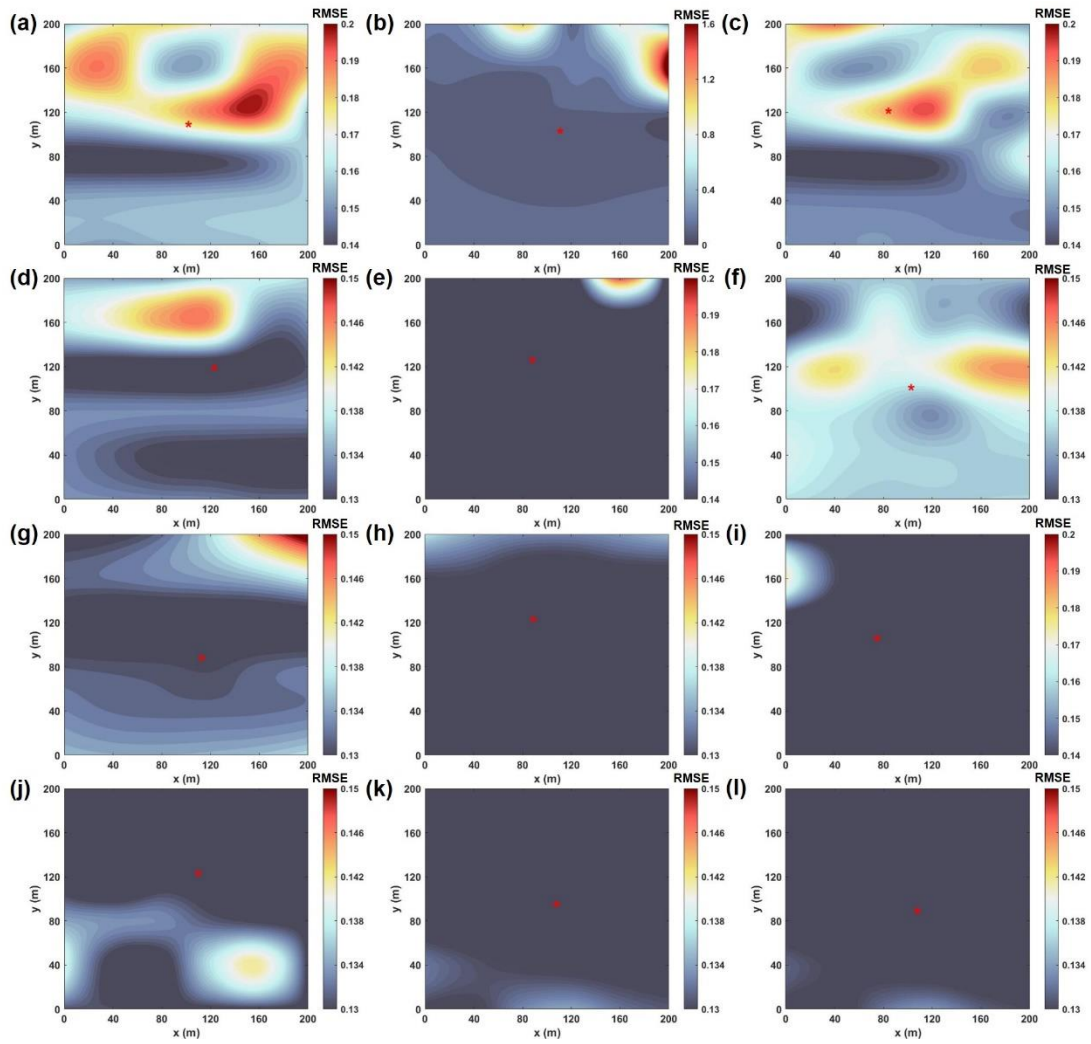

69

70 **Figure S12.** The root-mean-square error (RMSE) of monitoring simulated concentration changes

71 with the location of the WWTP source on 20 December.

72

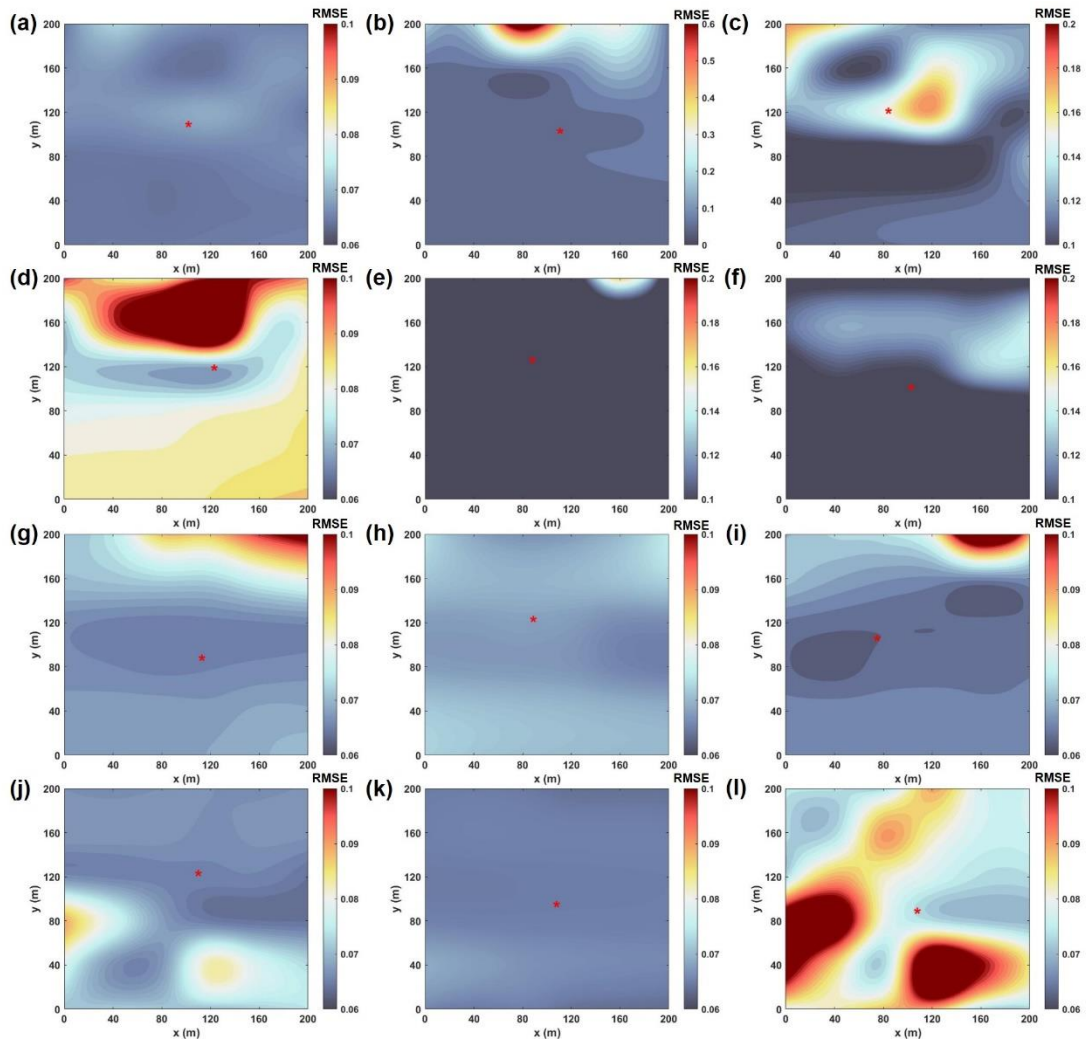

73

74 **Figure S13.** The root-mean-square error (RMSE) of monitoring simulated concentration changes

75 with the location of the WWTP source on 21 December.

76

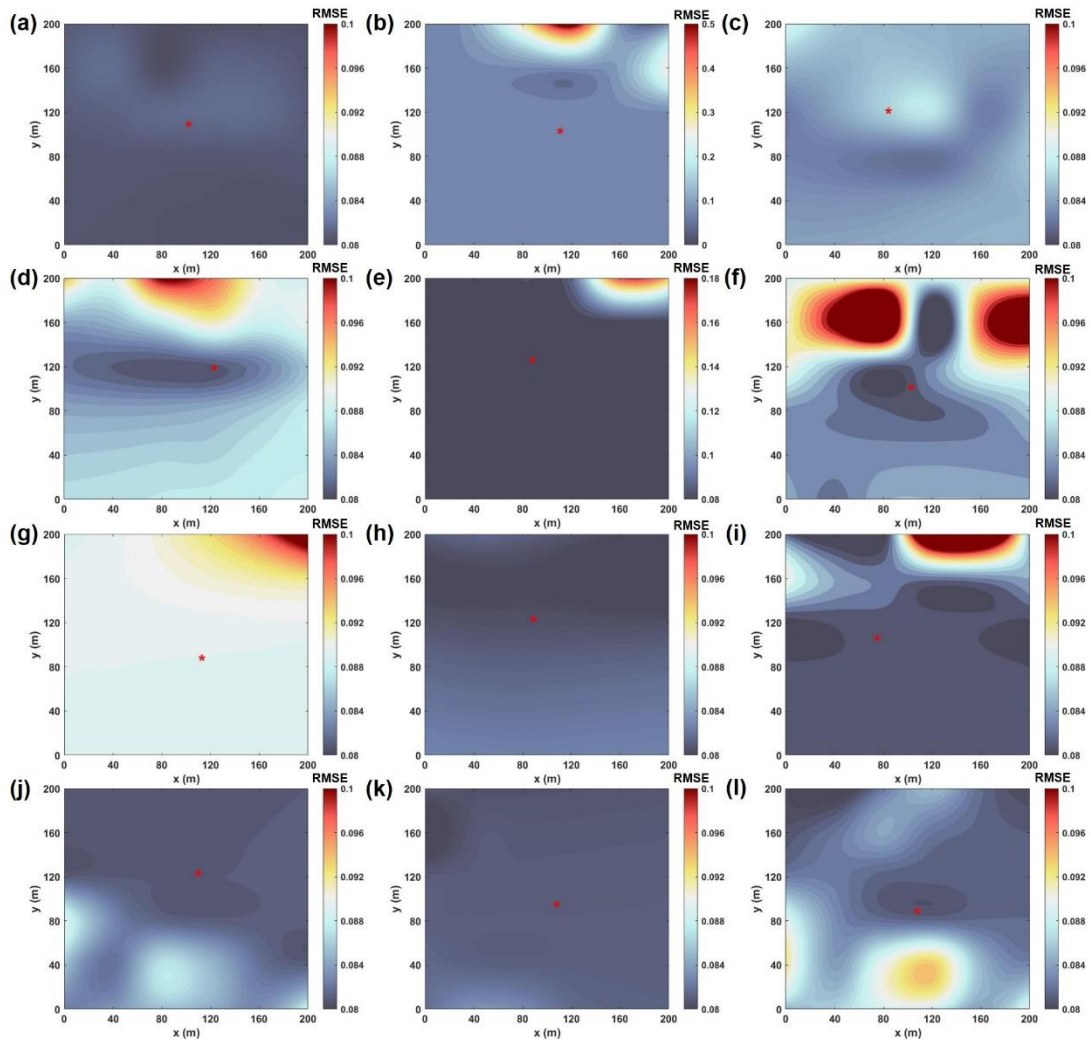

77

78 **Figure S14.** The root-mean-square error (RMSE) of monitoring simulated concentration changes

79 with the location of the WWTP source on 22 December.

80

81 **Tables**

82 **Table S1.** CH<sub>4</sub> emission fluxes of experimental emission sources in summer measurements. Serial  
 83 number 1-12 corresponds to the types of point sources in Figure 3 (a) and 4 (a) in the text, and serial  
 84 number 13 is the line source.

| Emission Sources              | Emission Fluxes (kg h <sup>-1</sup> ) |       |       |
|-------------------------------|---------------------------------------|-------|-------|
|                               | 0601                                  | 0629  | 0711  |
| 1-Aeration Tank ③             | 7.55                                  | 7.07  | 5.75  |
| 2-Primary Clarifier ③         | 2.04                                  | 1.90  | 1.95  |
| 3-Screen ①                    | 4.45                                  | 18.26 | 3.05  |
| 4-Primary Clarifier ④         | 2.97                                  | 2.88  | 2.86  |
| 5-Aeration Tank ④             | 3.58                                  | 7.94  | 20.99 |
| 6- Primary Clarifier ⑤        | 3.21                                  | 1.40  | 1.44  |
| 7-Aeration Tank ②             | 4.29                                  | 1.90  | 1.96  |
| 8-Aeration Tank ①             | 3.05                                  | 2.90  | 3.06  |
| 9-Aeration Tank ⑤             | 4.53                                  | 3.68  | 2.07  |
| 10-Secondary Clarifier ①      | 1.55                                  | 1.31  | 1.60  |
| 11-Secondary Clarifier ②      | 0.73                                  | 1.23  | 1.14  |
| 12-Sludge Treatment           | 1.96                                  | 1.82  | 1.98  |
| 13-Screen①-Primary Clarifier① | 21.94                                 | 22.61 | 21.74 |
| Total                         | 61.85                                 | 74.90 | 69.59 |

85

86 **Table S2.** CH<sub>4</sub> emission fluxes of experimental emission sources in winter measurements.

| Emission Sources              | Emission Fluxes (kg h <sup>-1</sup> ) |       |       |       |       |
|-------------------------------|---------------------------------------|-------|-------|-------|-------|
|                               | 1213                                  | 1214  | 1220  | 1221  | 1222  |
| 1-Aeration Tank ③             | 3.78                                  | 3.53  | 4.33  | 1.79  | 0.86  |
| 2-Primary Clarifier ③         | 3.25                                  | 1.86  | 4.03  | 2.69  | 2.06  |
| 3-Screen ①                    | 3.57                                  | 2.81  | 3.93  | 3.90  | 3.62  |
| 4-Primary Clarifier ④         | 3.03                                  | 2.80  | 2.11  | 3.12  | 3.08  |
| 5-Aeration Tank ④             | 0.61                                  | 0.65  | 0.53  | 0.80  | 0.90  |
| 6- Primary Clarifier ⑤        | 2.43                                  | 0.18  | 2.34  | 3.00  | 4.50  |
| 7-Aeration Tank ②             | 1.30                                  | 1.59  | 3.14  | 3.10  | 3.02  |
| 8-Aeration Tank ①             | 2.77                                  | 3.16  | 2.86  | 3.28  | 3.05  |
| 9-Aeration Tank ⑤             | 3.93                                  | 1.70  | 1.49  | 0.96  | 1.59  |
| 10-Secondary Clarifier ①      | 1.57                                  | 1.31  | 1.48  | 1.64  | 1.99  |
| 11-Secondary Clarifier ②      | 0.83                                  | 0.97  | 1.12  | 0.92  | 1.05  |
| 12-Sludge Treatment           | 2.12                                  | 2.05  | 3.15  | 2.03  | 2.32  |
| 13-Screen①-Primary Clarifier① | 20.01                                 | 20.66 | 19.48 | 20.94 | 20.12 |
| Total                         | 49.20                                 | 43.27 | 49.99 | 48.17 | 48.16 |

87
